# Supplementary material for: Melatonin significantly influences seed germination and seedling growth of Stevia rebaudiana Bertoni
Source: PeerJ. 2018 Jun 22;6:e5009. doi: 10.7717/peerj.5009 (PMC6016539; doi:10.7717/peerj.5009)
Supplement: Data S1 [file peerj-06-5009-s001.xls]

## Sheet: Arkusz1
Fig. 2. Effects of melatonin on stevia seed germination
0 h preincubation
		days of germination
	replicates	1	2	3	4	5	6	7	8	9	10	11	12	13	14	15	16	17	18	19	20	21
AG	I	0	1	1	1	1	2	3	1	0	0	1	0	0	0	0	0	0	0	0	0	0
AG	II	0	1	2	1	2	1	2	1	1	0	0	0	0	0	0	0	0	0	0	0	0
AG	III	0	2	1	2	1	0	1	0	0	1	1	1	0	0	0	0	0	0	0	0	0
AG	IV	0	0	2	2	2	1	2	0	1	0	1	0	0	0	0	0	0	0	0	0	0
AG + 5 µM MEL	I	0	1	1	0	1	1	1	1	1	0	0	0	0	0	0	1	0	0	0	0	0
AG + 5 µM MEL	II	1	1	1	2	1	1	1	1	0	0	0	0	0	0	0	0	0	0	0	0	0
AG + 5 µM MEL	III	0	1	1	1	1	1	1	0	1	0	1	0	0	0	0	0	0	0	0	0	0
AG + 5 µM MEL	IV	0	0	0	2	2	0	1	1	0	0	1	0	0	0	0	0	0	0	0	0	0
AG + 20 µM MEL	I	0	1	0	1	0	0	2	1	2	0	1	0	0	0	0	0	0	0	0	0	0
AG + 20 µM MEL	II	0	1	2	1	2	1	0	0	1	0	0	0	0	0	0	0	0	0	0	0	0
AG + 20 µM MEL	III	0	1	2	1	2	1	1	0	1	0	0	0	0	0	0	0	0	0	0	0	0
AG + 20 µM MEL	IV	0	2	1	2	0	1	3	0	1	0	0	0	0	0	0	0	0	0	0	0	0
AG + 100 µM MEL	I	0	0	0	2	0	0	0	1	0	0	0	1	1	0	0	0	0	0	0	0	0
AG + 100 µM MEL	II	0	1	2	1	1	0	1	1	2	0	0	0	0	0	0	0	0	0	0	0	0
AG + 100 µM MEL	III	0	1	1	1	0	2	1	0	1	0	0	0	0	0	0	0	0	0	0	0	0
AG + 100 µM MEL	IV	0	0	1	0	2	1	1	2	0	0	0	0	0	0	0	0	0	0	0	0	0
AG + 500 µM MEL	I	0	1	0	2	1	0	0	0	1	0	1	0	0	0	0	0	0	0	0	0	0
AG + 500 µM MEL	II	0	1	1	2	1	1	0	1	0	0	0	0	0	0	0	0	0	0	0	0	0
AG + 500 µM MEL	III	0	1	0	0	1	1	2	1	0	0	0	0	0	0	0	0	0	0	0	0	0
AG + 500 µM MEL	IV	1	1	1	1	0	0	0	0	0	1	0	0	0	0	0	0	0	0	0	0	0
24 h preincubation
		days of germination
	replicates	1	2	3	4	5	6	7	8	9	10	11	12	13	14	15	16	17	18	19	20	21
AG	I	0	1	1	4	1	1	0	1	0	0	0	0	0	0	0	0	0	0	0	0	1
AG	II	0	1	1	3	1	2	1	0	0	0	0	0	0	0	0	0	0	0	1	0	0
AG	III	1	1	1	3	1	2	0	1	0	0	0	0	0	0	0	0	0	0	0	0	0
AG	IV	1	1	1	4	1	2	1	0	0	0	0	0	0	0	0	0	0	0	0	0	0
AG + 5 µM MEL	I	0	1	0	3	1	0	2	1	2	0	1	1	0	0	0	0	0	0	0	0	0
AG + 5 µM MEL	II	0	1	1	1	2	2	1	1	1	0	0	0	1	0	0	0	0	0	0	0	0
AG + 5 µM MEL	III	0	1	1	3	1	2	1	1	1	0	0	0	1	0	0	0	0	0	0	0	0
AG + 5 µM MEL	IV	0	2	1	2	1	1	2	1	2	0	0	0	0	0	0	0	0	0	0	0	0
AG + 20 µM MEL	I	1	3	1	0	1	1	2	1	0	1	0	1	0	0	0	0	0	0	0	0	0
AG + 20 µM MEL	II	1	1	2	1	1	2	1	0	2	2	1	0	0	0	0	0	1	0	0	0	0
AG + 20 µM MEL	III	0	1	2	1	1	2	1	1	2	0	1	1	1	0	0	0	0	0	0	0	0
AG + 20 µM MEL	IV	1	2	1	1	1	1	2	1	0	1	1	0	0	0	0	0	0	0	0	0	0
AG + 100 µM MEL	I	0	1	0	3	1	0	0	1	0	0	1	1	0	0	0	0	0	0	0	0	0
AG + 100 µM MEL	II	0	1	0	1	1	2	1	1	0	0	0	0	1	0	0	0	0	0	0	0	0
AG + 100 µM MEL	III	0	1	0	3	1	1	0	1	1	0	0	0	1	0	0	0	0	0	0	0	0
AG + 100 µM MEL	IV	0	2	1	1	1	1	0	1	0	0	0	0	0	0	0	0	0	0	0	0	0
AG + 500 µM MEL	I	0	0	0	1	1	0	0	1	1	0	1	1	0	0	0	0	0	0	0	0	0
AG + 500 µM MEL	II	0	2	2	0	2	1	0	0	1	0	0	0	0	0	0	0	0	0	0	0	0
AG + 500 µM MEL	III	0	1	1	1	0	1	0	1	0	0	1	1	0	0	0	0	1	0	0	0	0
AG + 500 µM MEL	IV	0	1	2	0	1	0	0	0	1	0	1	0	0	0	0	0	0	0	0	0	0
48 h preincubation
		days of germination
	replicates	1	2	3	4	5	6	7	8	9	10	11	12	13	14	15	16	17	18	19	20	21
AG	I	0	1	1	1	2	1	2	0	0	0	0	0	0	0	0	0	0	0	0	0	0
AG	II	1	0	2	1	1	2	1	1	0	0	0	0	0	0	0	0	0	0	0	0	0
AG	III	0	1	1	1	2	1	2	1	0	0	0	0	0	0	0	0	0	0	0	0	0
AG	IV	0	0	2	1	1	2	1	1	0	0	0	0	0	0	0	0	0	0	0	0	0
AG + 5 µM MEL	I	0	0	1	1	1	1	1	0	0	0	1	1	0	0	0	0	0	0	0	0	0
AG + 5 µM MEL	II	0	0	2	2	1	1	0	0	1	0	0	0	1	0	0	0	0	0	0	0	0
AG + 5 µM MEL	III	0	1	1	2	1	2	0	0	1	0	0	0	0	0	0	1	0	0	0	0	0
AG + 5 µM MEL	IV	0	0	1	1	2	2	1	0	0	0	0	0	0	0	0	1	0	0	0	0	0
AG + 20 µM MEL	I	0	1	1	1	0	1	1	1	1	1	0	0	0	0	0	0	0	0	0	0	0
AG + 20 µM MEL	II	0	1	3	1	1	0	1	0	1	1	0	0	0	0	0	0	0	0	0	0	0
AG + 20 µM MEL	III	0	2	2	1	1	0	0	1	0	2	0	0	0	0	0	0	1	0	0	0	0
AG + 20 µM MEL	IV	0	1	0	1	0	1	2	1	1	1	1	0	0	0	0	0	0	0	0	0	0
AG + 100 µM MEL	I	0	1	1	1	1	2	1	0	0	0	0	0	0	0	0	0	0	0	0	0	0
AG + 100 µM MEL	II	0	2	1	1	1	0	0	1	0	0	1	0	0	0	0	0	0	0	0	0	0
AG + 100 µM MEL	III	0	1	2	1	1	1	1	0	0	0	0	0	0	0	0	0	0	0	0	0	0
AG + 100 µM MEL	IV	0	1	0	2	1	1	0	0	1	0	0	0	0	0	0	0	0	0	0	0	0
AG + 500 µM MEL	I	0	1	0	1	0	1	3	0	0	0	0	0	0	0	0	0	0	0	0	0	0
AG + 500 µM MEL	II	0	0	1	1	2	0	1	1	1	0	0	0	0	0	0	0	0	0	0	0	0
AG + 500 µM MEL	III	0	0	1	1	1	1	1	0	0	0	0	0	0	0	0	0	0	0	0	0	0
AG + 500 µM MEL	IV	0	1	0	0	0	1	1	1	1	0	0	1	0	0	0	0	0	0	0	0	0
Table 2. Effects of melatonin on stevia growth in in vitro conditions.
	replicates	Fresh weight [g]	Shoot fresh weight [g]	Stem lenght [cm]	Internode lenght [cm]	Leaves/plantlets number	Roots number	Root length [cm]
0 µM MEL (control)	I	0.3163	0.2021	4	0.77	12	11	4
0 µM MEL (control)	II	0.23	0.1725	3.5	0.57	10	10	3.5
0 µM MEL (control)	III	0.3663	0.2021	3.66	0.67	8	8	3.66
0 µM MEL (control)	IV	0.33	0.0725	3.32	0.87	12	8	3.32
0 µM MEL (control)	V	0.31	0.1993	3.67	0.47	8	6	3.67
0 µM MEL (control)	VI	0.1983	0.1264	3.77	0.77	8	8	3.87
0 µM MEL (control)	VII	0.33	0.2015	3.42	0.57	8	9	3.32
0 µM MEL (control)	VIII	0.4388	0.2707	3.67	0.67	12	9	3.67
0 µM MEL (control)	IX	0.33	0.1815	3.67	0.87	8	9	3.87
0 µM MEL (control)	X	0.4288	0.2107	3.69	0.47	12	10	3.69
5 µM MEL	I	0.2586	0.1419	4	0.83	11	9	3.47
5 µM MEL	II	0.1001	0.077	4.5	0.93	10	5	3.43
5 µM MEL	III	0.1295	0.1295	4.66	0.83	8	6	3.34
5 µM MEL	IV	0.1923	0.149	4.32	0.88	12	6	3.37
5 µM MEL	V	0.1596	0.0825	4.37	0.68	8	7	3.67
5 µM MEL	VI	0.106	0.0912	4.74	0.83	8	5	3.27
5 µM MEL	VII	0.0955	0.1362	4.42	0.93	9	7	3.32
5 µM MEL	VIII	0.3173	0.1953	4.37	0.83	10	7	3.67
5 µM MEL	IX	0.1174	0.144	3.98	0.88	9	8	3.37
5 µM MEL	X	0.1492	0.1003	4.79	0.68	11	7	3.49
20 µM MEL	I	0.3476	0.2136	4	0.77	12	10	3.47
20 µM MEL	II	0.5925	0.4433	4.21	0.57	10	9	3.43
20 µM MEL	III	0.46	0.21	3.66	0.67	12	7	3.34
20 µM MEL	IV	0.49	0.4	3.82	0.87	12	9	3.37
20 µM MEL	V	0.44	0.29	3.67	0.47	12	7	3.57
20 µM MEL	VI	0.51	0.31	4.09	0.77	14	9	3.27
20 µM MEL	VII	0.34	0.21	3.92	0.57	12	8	3.32
20 µM MEL	VIII	0.59	0.4	3.67	0.67	10	8	3.37
20 µM MEL	IX	0.44	0.29	3.67	0.87	10	8	3.37
20 µM MEL	X	0.51	0.31	3.99	0.57	12	8	3.39
100 µM MEL	I	0.235	0.1791	2.9	0.47	10	7	3.12
100 µM MEL	II	0.1643	0.1091	2.21	0.47	10	7	3.33
100 µM MEL	III	0.4091	0.1112	2.66	0.37	8	6	3.23
100 µM MEL	IV	0.1551	0.1021	2.82	0.47	12	5	3.15
100 µM MEL	V	0.1835	0.1142	2.67	0.57	8	7	3.09
100 µM MEL	VI	0.235	0.1223	2.69	0.37	8	5	3.01
100 µM MEL	VII	0.1743	0.1091	2.46	0.47	8	5	3.42
100 µM MEL	VIII	0.2091	0.1012	2.34	0.47	10	6	2.98
100 µM MEL	IX	0.1551	0.1521	2.67	0.37	8	5	3.87
100 µM MEL	X	0.1635	0.1142	2.34	0.57	10	7	2.99
500 µM MEL	I	0.1721	0.09	2.2	0.37	10	14	3.12
500 µM MEL	II	0.167	0.065	2.1	0.41	10	13	2.91
500 µM MEL	III	0.1356	0.12	1.66	0.37	8	11	3.123
500 µM MEL	IV	0.1532	0.12	2.12	0.28	12	11	3.15
500 µM MEL	V	0.1721	0.087	2.47	0.37	8	14	3.01
500 µM MEL	VI	0.167	0.09	2.5	0.37	8	15	3.01
500 µM MEL	VII	0.1456	0.065	2.16	0.32	8	12	3.132
500 µM MEL	VIII	0.1532	0.12	2.34	0.39	10	13	2.98
500 µM MEL	IX	0.1211	0.12	2.53	0.29	12	15	2.87
500 µM MEL	X	0.14	0.087	1.99	0.27	10	14	2.99
Fig. 5. Effects of melatonin on the content of pigments (A), soluble sugars (B) and phenolics (C) in 4-week-old plantlets.
	replicates	chl a	chl b	car	soluble sugars	phenolics
0 µM MEL (control)	I	25.7721	18.4108	1.07656	133.184	4.91304
0 µM MEL (control)	II	25.8791	20.6031	1.14167	139.417	5.25485
0 µM MEL (control)	III	25.665	19.5069	1.10912	135.623	5.00991
5 µM MEL	I	69.8659	42.6619	6.74539	159.914	5.65102
5 µM MEL	II	70.1795	40.3926	7.31237	153.703	5.57762
5 µM MEL	III	69.5524	44.9311	5.81299	150.936	5.10507
20 µM MEL	I	31.681	21.2052	2.8856	147.114	5.53079
20 µM MEL	II	31.9399	22.726	3.21471	143.145	5.31772
20 µM MEL	III	32.1988	24.2469	3.54382	149.298	5.45702
100 µM MEL	I	43.0888	24.4577	2.79232	163.497	6.05168
100 µM MEL	II	41.5869	24.4854	4.49976	168.467	6.31703
100 µM MEL	III	41.4633	22.7654	4.34015	161.864	6.01923
500 µM MEL	I	33.6614	20.6504	3.48391	217.484	8.80123
500 µM MEL	II	38.5794	22.0996	3.67548	244.258	8.82099
500 µM MEL	III	36.9473	22.9732	3.29234	244.411	8.79673
Fig. 6. Effects of melatonin on antioxidant enzymes activity in 4-week-old plantlets.
	replicates	CAT	POD	SOD
0 µM MEL (control)	I	166.121	160.92	0.897991
0 µM MEL (control)	II	171.025	215.18	0.875657
0 µM MEL (control)	III	168.572	160.92	0.886824
5 µM MEL	I	154.453	346.81	0.694131
5 µM MEL	II	145.581	353.45	0.72314
5 µM MEL	III	150.017	350.13	0.708636
20 µM MEL	I	80.1659	279.79	0.739461
20 µM MEL	II	40.7595	281.47	0.751327
20 µM MEL	III	60.4627	283.14	0.745394
100 µM MEL	I	150.42	619.29	0.521632
100 µM MEL	II	137.869	610.82	0.474891
100 µM MEL	III	144.145	615.06	0.498262
500 µM MEL	I	233.507	889.66	0.469484
500 µM MEL	II	199.801	939.36	0.557404
500 µM MEL	III	216.654	839.96	0.513444
